# Supplementary material for: Aiming for survival: a qualitative single case study of support for family members across the care process in outpatient colorectal cancer care
Source: Springer Nature journal article supplement (doi:10.1186/s12885-025-14245-2), 2025-05-12
Supplement: MOESM1 [file 12885_2025_14245_MOESM1_ESM.pdf]

**Additional file 1.** Interview guides.

|                                                                                                                                                                                                                                                                            |                                                                                                                                                                                                |
|----------------------------------------------------------------------------------------------------------------------------------------------------------------------------------------------------------------------------------------------------------------------------|------------------------------------------------------------------------------------------------------------------------------------------------------------------------------------------------|
| <p><b>Opening question FAMILY MEMBERS</b></p> <p><i>Please tell me about what your life has been like during this period.</i></p> <p><i>(Following the cancer trajectory chronologically)</i></p>                                                                          | <p><b>Opening question CONTACT NURSE</b></p> <p><i>Please tell me about your work as a CN.</i></p> <p><i>(Contact with family members following the cancer trajectory chronologically)</i></p> |
| <p><b>Support</b> (Emotional and spiritual support, information and practicalities)</p> <ul style="list-style-type: none"> <li>• Existing</li> <li>• Desired</li> <li>• Changed since earlier phases</li> <li>• The coming phases/ the future</li> </ul>                   | <p>Perception of support to family members</p>                                                                                                                                                 |
| <p><b>Needs</b> (Emotional and spiritual needs, information and practicalities)</p> <ul style="list-style-type: none"> <li>• Personal</li> <li>• Those of other family members</li> <li>• Changed since earlier phases</li> <li>• The coming phases/ the future</li> </ul> | <p>Family members' perceived needs</p>                                                                                                                                                         |
| <p><b>Resources/ Hinders</b></p> <ul style="list-style-type: none"> <li>• Personal</li> <li>• External</li> <li>• Changed since earlier phases</li> <li>• The coming phases/ the future</li> </ul>                                                                         | <p>Resources / hindrances for support</p>                                                                                                                                                      |
| <p><b>Concluding questions:</b> If you were to guide a family member who is about to enter your situation, what would you have wanted to communicate to this person?</p> <p>“What would you have liked the support for family members to look like?</p>                    | <p><b>Concluding question:</b> <i>In a perfect world with endless resources, how would you design the support to family members of persons with colorectal cancer?</i></p>                     |
